# Supplementary material for: Safety Assessment of Microcatheter-Protected Rotational Atherectomy with the Double Guiding Catheter Technique for Severely Calcified Left Main Bifurcation
Source: Hindawi journal article supplement (doi:10.1155/2022/1399510), 2022-08-09
Supplement: f1 [file 1399510.f1.docx]

Supplementary videos can be viewed through the shared Google Drive link：

https://drive.google.com/drive/folders/14ZTLcn_YtknxrzVwcRGzNnnHnpz8GNpj?usp=sharing
